# Supplementary material for: Novel TiO2/GO-Al2O3 Hollow Fiber Nanofiltration Membrane for Desalination and Lignin Recovery
Source: MDPI journal article supplement (doi:10.3390/membranes12100950), 2022-09-28
Supplement: s1 [file s1]

*Supplementary Materials*

# Novel TiO<sub>2</sub>/GO-Al<sub>2</sub>O<sub>3</sub> Hollow Fiber Nanofiltration Membrane for Desalination and Lignin Recovery

Xuelong Zhuang<sup>1</sup>, Edoardo Magnone<sup>1</sup>, Min Chang Shin<sup>1</sup>, Jeong In Lee<sup>1</sup>, Jae Yeon Hwang<sup>1</sup>, Young Chan Choi<sup>2</sup> and Jung Hoon Park<sup>1,\*</sup>

<sup>1</sup> Department of Chemical and Biochemical Engineering, Dongguk University, 30, Pildong-ro 1 gil, Jung-gu, Seoul, 04620, South Korea

<sup>2</sup>Fine Dust Research, Korea Institute of Energy Research (KIER), Daejeon, 34129, Korea

\* Correspondence: author. Tel: +82-2-2260-8598. Fax: +82-2-2260-8729. E-mail: pjhoon@dongguk.edu

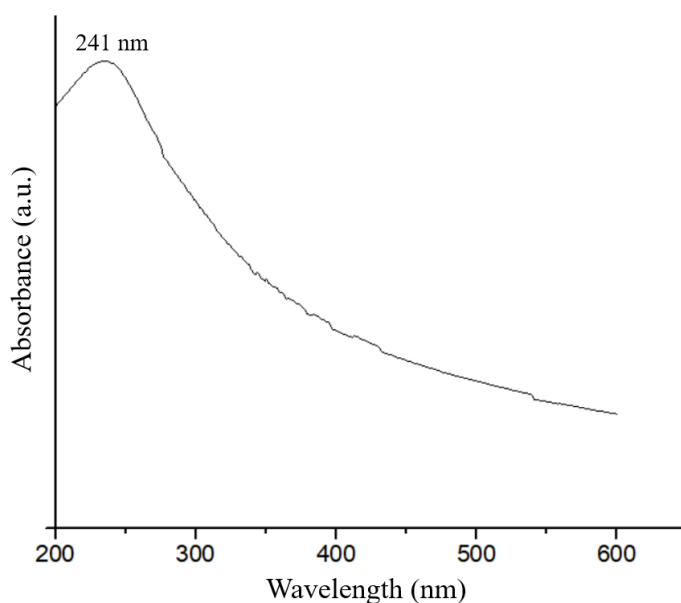

**Figure S1.** UV-vis spectra of prepared GO.
